# Supplementary material for: A lncRNA from an inflammatory bowel disease risk locus maintains intestinal host-commensal homeostasis
Source: PubMed Central journal article supplement (PMC10156687; doi:10.1038/s41422-023-00790-7), 2023-04-13
Supplement: 41422_2023_790_MOESM5_ESM.pdf [file 41422_2023_790_MOESM5_ESM.pdf]

**a Schematic diagram**

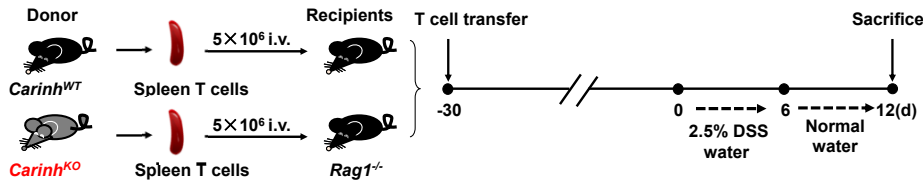

**b Purity of transferred T cells**

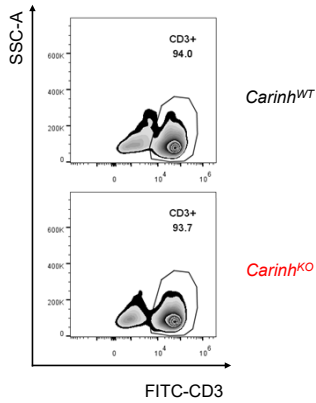

**c Body weight change before and after the T cells transfer**

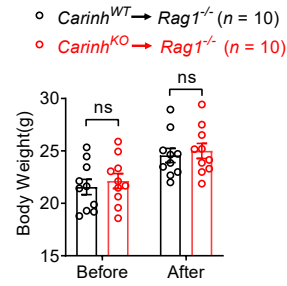

**d T cell reconstruction efficiency**

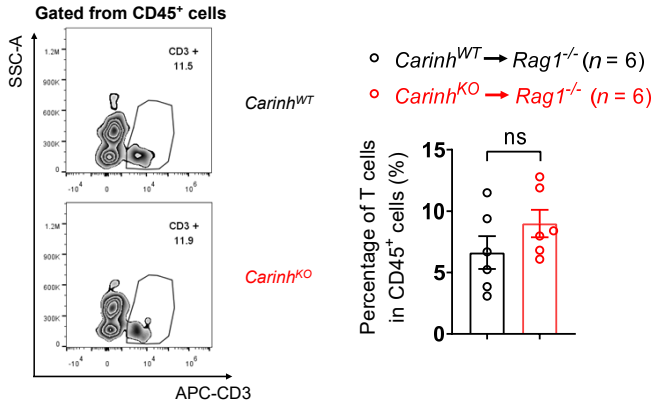

**e Body weight**

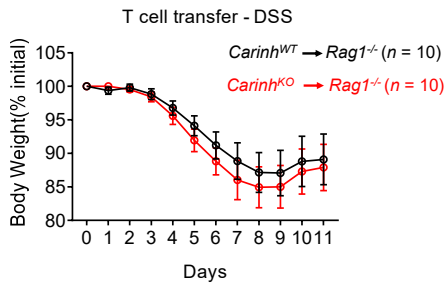

**f Colon length**

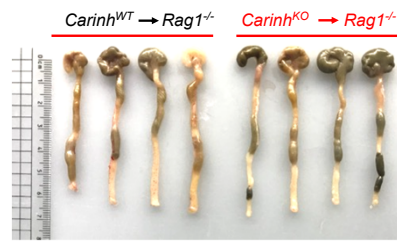

**g Colon length statistics**

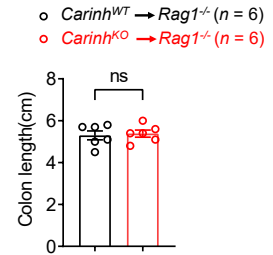

**h Colon histology**

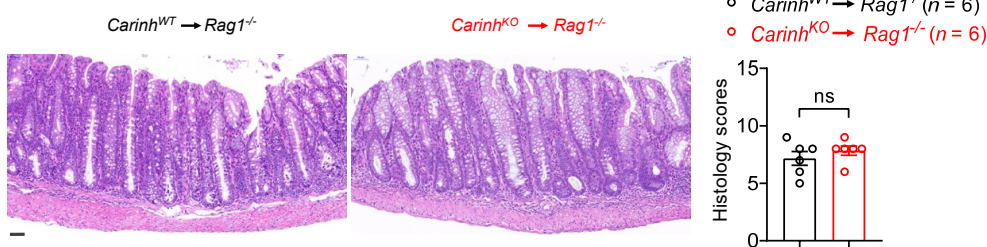

**Supplementary information, Fig. S5 Carinh deficient T cell-reconstituted mice were not susceptible to DSS-induced colitis**

**a-h.** *Rag1*<sup>-/-</sup> mice were adoptively transferred with T cells from *Carinh*<sup>WT</sup> or *Carinh*<sup>KO</sup> mice. Four weeks later, the DSS colitis model was induced for these recipient mice (**a**). T cell purity before transfer (**b**) and T cell reconstruction efficiency before DSS treatment (**d**) were analyzed by flow cytometry. Body weight changes before and after T cell transfer were compared between *Carinh*<sup>WT</sup> and *Carinh*<sup>KO</sup> T cell transferred recipients (**c**). DSS induced colitis was monitored by body weight loss (**e**), colon shortening (**f, g**), and H&E staining of colon tissues (**h**). For H&E staining (**h**): Left, representative pictures. Scale bars, 50µm. Right, quantification of corresponding histology scores. 5 views per mice, 6 mice per group.

Data in (**c, e**) are pooled from two independent experiments. Data in (**f, h**) and data in (**d, g**) are representative of two independent experiments. Data are shown as means ± SEM. Body weight changes (**e**) were analyzed by two-way ANOVA. Unpaired two-tailed Student's *t*-tests were used for other analyses. ns, not significant. Scale bars, 50µm.
