# Supplementary material for: A lncRNA from an inflammatory bowel disease risk locus maintains intestinal host-commensal homeostasis
Source: PubMed Central journal article supplement (PMC10156687; doi:10.1038/s41422-023-00790-7), 2023-04-13
Supplement: 41422_2023_790_MOESM11_ESM.pdf [file 41422_2023_790_MOESM11_ESM.pdf]

**a** *Gm12216* isoforms of CD11b<sup>+</sup> cells sorted from colon

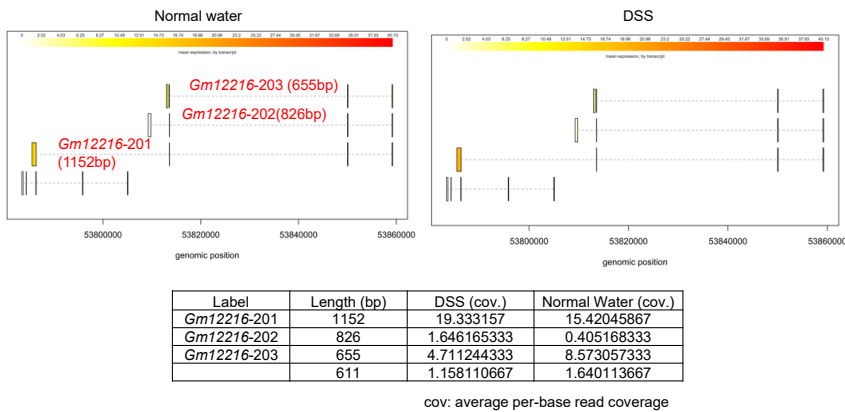

**b** RIP of *Gm12216* isoforms with CBP or p300

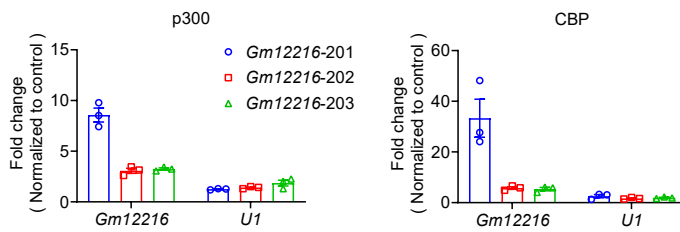

**c** *Gm12216* isoforms overexpression

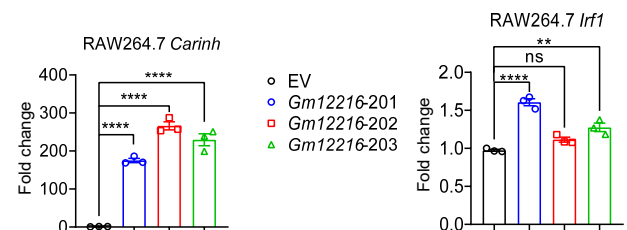

**d** RIP of Exon 1-2 of *Carinh* with CBP or p300

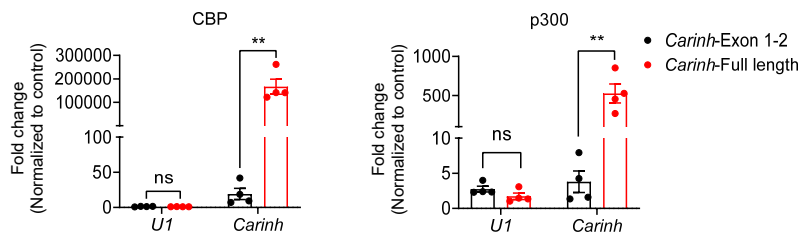

**Supplementary information, Fig. S11 Analysis of isoforms of *Gm12216*.**

**a.** Isoforms of *Gm12216* were examined by RNA-seq. CD11b<sup>+</sup> cells were sorted from colons of mice treated with DSS or water for RNA-seq. Isoforms of *Gm12216* were analyzed and named according to annotations in Ensembl

([http://asia.ensembl.org/Mus\\_musculus/Gene/Summary?db=core;g=ENSMUSG00000081769;r=11:53674244-53750082](http://asia.ensembl.org/Mus_musculus/Gene/Summary?db=core;g=ENSMUSG00000081769;r=11:53674244-53750082))

**b.** RNA-binding protein immunoprecipitation (RIP) analysis between *Gm12216* isoforms and H3K27ac modifier p300/CBP. Protein extracts from HEK293 cells transfected with HA-tagged p300 or HA-tagged CBP and *Gm12216* isoforms, were immunoprecipitated with HA antibodies. *Gm12216* isoforms binds to p300 or CBP were assayed by qPCR. *U1* represents a non-relevant control. Data are presented as relative expression of input and normalized to HA-EV controls.  $n = 3$  per group.

**c.** qPCR analyses of *Carinh* and *Irf1* mRNA expression in RAW264.7 cells transfected with *Gm12216* isoforms plasmid or empty vector.  $n = 3$  per group.

**d.** RIP analysis showed the bindings between the CBP/p300 with full length *Carinh* or truncation.  $n = 4$  per group.

Data in **b**, **c**, **d** are representative of at least 3 independent experiments. Data represent means  $\pm$  SEM.

Data in **(c)** was analyzed by one-way ANOVA. \*\* $P < 0.01$ , \*\*\*\* $P < 0.0001$ , ns, not significant.

Data in **(d)** was analyzed by unpaired two-tailed Student's *t*-tests. \*\* $P < 0.01$ , ns, not significant.
