# Supplementary material for: A lncRNA from an inflammatory bowel disease risk locus maintains intestinal host-commensal homeostasis
Source: PubMed Central journal article supplement (PMC10156687; doi:10.1038/s41422-023-00790-7), 2023-04-13
Supplement: 41422_2023_790_MOESM14_ESM.pdf [file 41422_2023_790_MOESM14_ESM.pdf]

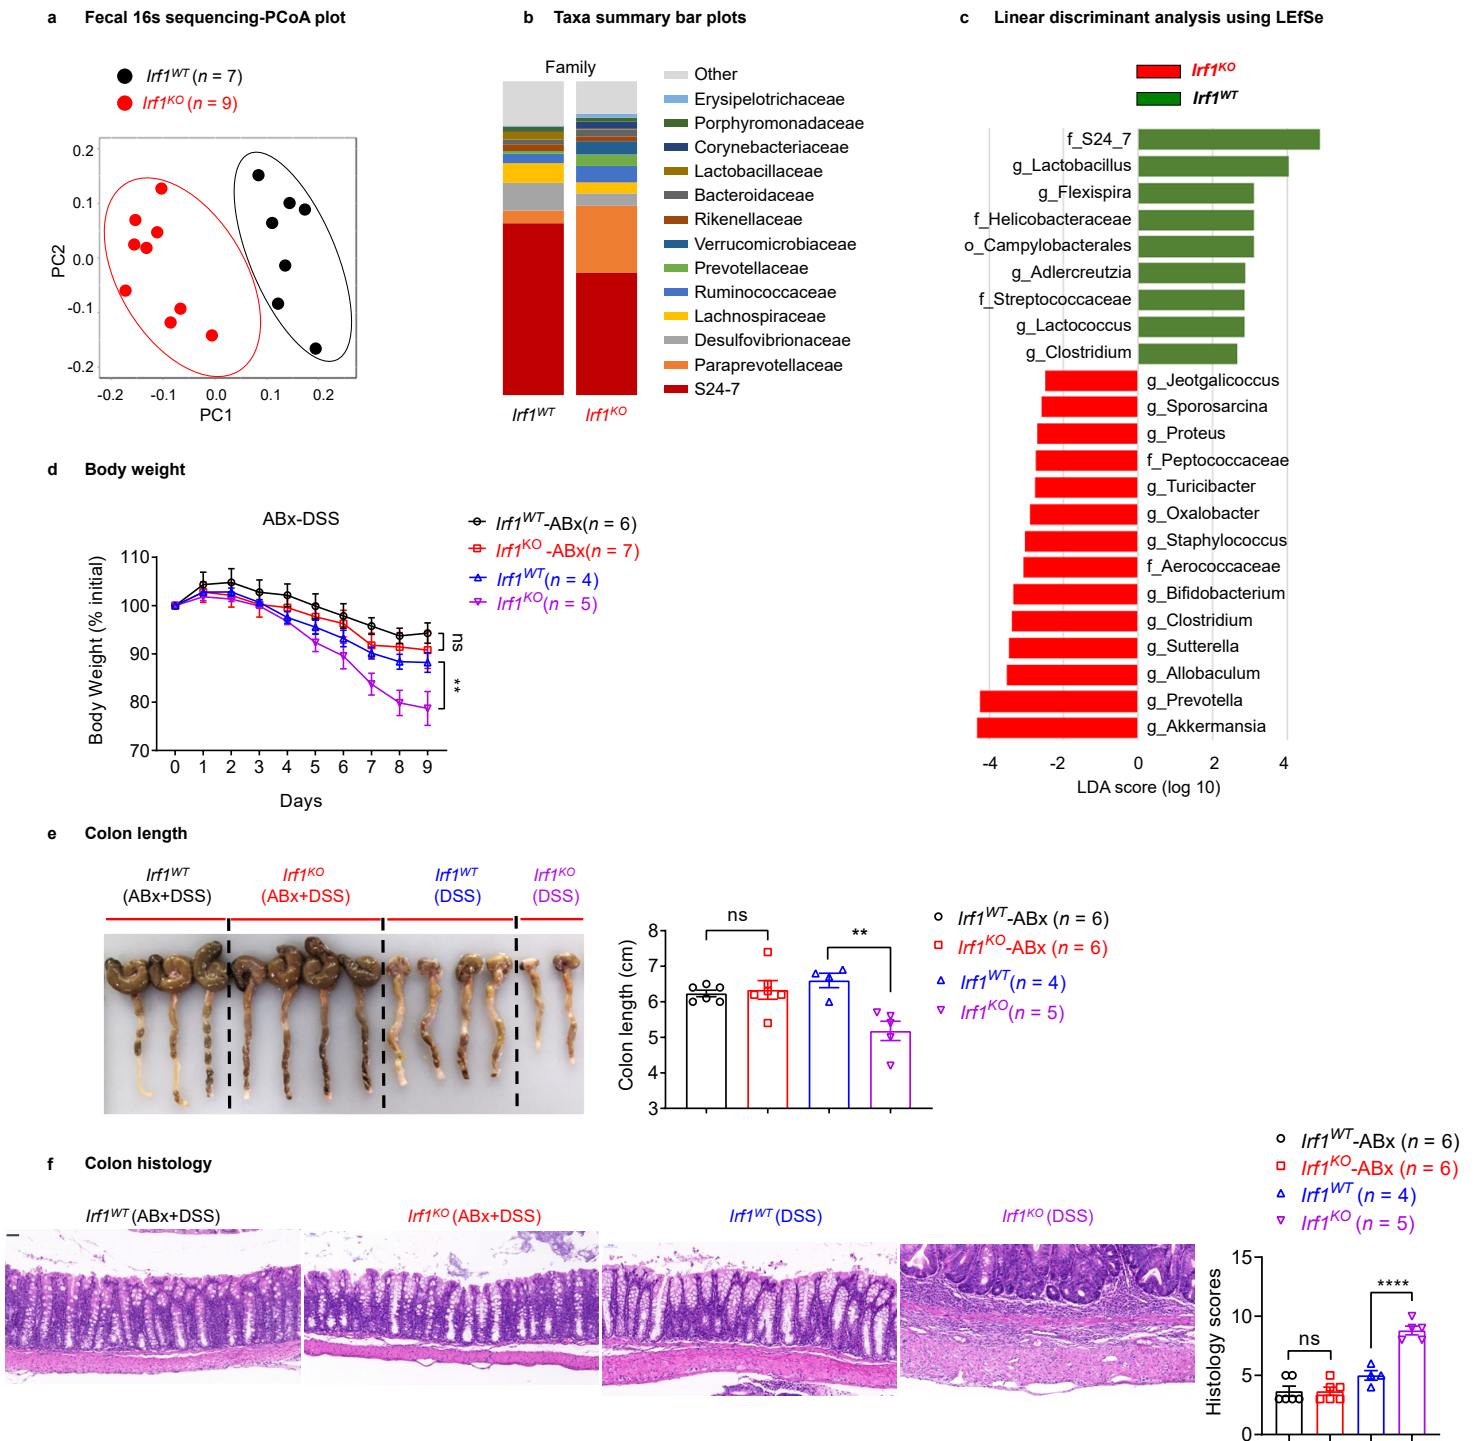

**Supplementary information, Fig. S14 Depletion of altered microbiota alleviates the severer colitis in *Lrf1*<sup>KO</sup> mice.**

**a-c.** Fecal 16s rDNA sequencing analysis of *Lrf1*<sup>KO</sup> mice and their littermates.

**a.** PCoA plot generated from unweighted UniFrac distance matrix displaying the distinct clustering pattern for the intestinal bacteria communities of *Lrf1*<sup>KO</sup> mice ( $n = 9$ ) and of their littermates ( $n = 7$ ).

**b.** Relative abundance of taxonomic groups averaged across *Lrf1*<sup>KO</sup> mice ( $n = 9$ ) and their littermates ( $n = 7$ ) at the family level.

**c.** Composition differences of the intestinal microbiota in *Lrf1*<sup>KO</sup> mice and their littermates, determined by linear discriminant analysis using LEfSe.

*Lrf1*<sup>KO</sup> ( $n = 9$ ) and their littermates *Lrf1*<sup>WT</sup> ( $n = 7$ ) mice were used in 16s rDNA sequencing experiments and were representative of 2 independent 16s rDNA sequencing experiments.

**d-f.** ABx-treated and untreated *Lrf1*<sup>KO</sup> mice and their littermates were induced with 2.5% DSS. Colitis was monitored by body weight loss (**d**), colon shortening (**e**), and H&E staining of colon tissues (**f**). For H&E staining (**f**): Left, representative pictures. Scale bars, 50 $\mu$ m. Right, quantification of corresponding histology scores. 5 views per mice.

Data (**d-f**) are representative of 3 independent experiments. Data are shown as means  $\pm$  SEM. Body weight changes (**d**) was analyzed by two-way ANOVA. Colon length (**e**) and histology scores (**f**) were analyzed by one-way ANOVA. \*\* $P < 0.01$ , \*\*\*\* $P < 0.0001$ , ns, not significant.
