# Supplementary material for: A lncRNA from an inflammatory bowel disease risk locus maintains intestinal host-commensal homeostasis
Source: PubMed Central journal article supplement (PMC10156687; doi:10.1038/s41422-023-00790-7), 2023-04-13
Supplement: 41422_2023_790_MOESM16_ESM.pdf [file 41422_2023_790_MOESM16_ESM.pdf]

**Supplementary information Table S1** List of sequences**1.1 Mouse gene qPCR primer list**

| <b>Name</b>          | <b>Sequence</b>          |
|----------------------|--------------------------|
| m- <i>Carinh</i> -1F | GACTGTCACGACGGGTGATG     |
| m- <i>Carinh</i> -1R | GCTTCCAGGCAAGTCTTCAG     |
| m- <i>Carinh</i> -2F | CACGACGGTCGACTGTCAC      |
| m- <i>Carinh</i> -2R | CAGCCTCCTGACATCACAAG     |
| m- <i>Carinh</i> -3F | AGGAGGCTGGACAGCCAAG      |
| m- <i>Carinh</i> -3R | TGGCGGCCTCAGCATCTTC      |
| m- <i>Carinh</i> -4F | AGCGCCTCCAACGAGAACAG     |
| m- <i>Carinh</i> -4R | CTGGCGGCCTCAGCATCTTC     |
| m- <i>Carinh</i> -5F | CCCTAGCAAGGACAGCTAAG     |
| m- <i>Carinh</i> -5R | GGTTGAGCAGTCTCTGGATG     |
| m- <i>Carinh</i> -6F | CCAGGGAGGGTTCATTTGAG     |
| m- <i>Carinh</i> -6R | CGGCAACAGGAACTGACAC      |
| m- <i>Irf1</i> -F    | ATGCCAATCACTCGAATGCG     |
| m- <i>Irf1</i> -R    | CCTGCTTTGTATCGGCCTGT     |
| m- <i>Gbp2</i> -F    | GGAAAACCCGTCACCTTCTGAT   |
| m- <i>Gbp2</i> -R    | CAGTCGCGGCTCATTAAAGC     |
| m- <i>Gbp3</i> -F    | TCGGCCCATCACAGAAGATGA    |
| m- <i>Gbp3</i> -R    | GGAAATTCGGTTCAGTTGGTT    |
| m- <i>Gbp4</i> -F    | GAGCAGCTCATCAAAGACCA     |
| m- <i>Gbp4</i> -R    | TTCCTCACGGAAAGTCTTTTG    |
| m- <i>Gbp5</i> -F    | CCAGAGTAAAGCGGAACAAG     |
| m- <i>Gbp5</i> -R    | GTGCAACTCTTGCCCTTCTCC    |
| m- <i>Gbp6</i> -F    | TCATCTTGGTGGTTGGAACA     |
| m- <i>Gbp6</i> -R    | TCATGAGAAACAATGTCACAAGG  |
| m- <i>Gbp7</i> -F    | AAACAGCATGAGCACCATCAA    |
| m- <i>Gbp7</i> -R    | GAAGTGGACTTTGCCCTGAT     |
| m- <i>Gbp8</i> -F    | TGAGGGTATTTTCATCACAGCA   |
| m- <i>Gbp8</i> -R    | TTGCCAATCTAACTCAGGGATG   |
| m- <i>Gbp9</i> -F    | ACCGGGAATAGACTGGGTACT    |
| m- <i>Gbp9</i> -R    | CCGGGCCACACTTGTGATA      |
| m- <i>Gbp10</i> -F   | CTGTGCAGTCTCAAACCAAG     |
| m- <i>Gbp10</i> -R   | CACAAGTCGTTCTTAGG        |
| m- <i>Gbp11</i> -F   | AGCAACTGAGAAGGAAGCTGA    |
| m- <i>Gbp11</i> -R   | CAAGGAGAGCCTTTTGTTCCCT   |
| m- <i>Slc22a5</i> -F | ACTGTGCCAGGGGTGCTAT      |
| m- <i>Slc22a5</i> -R | TCCGTGTTCCGGATCAGATCATAA |
| m- <i>Irf3</i> -F    | GAGAGCCGAACGAGGTTTCAG    |
| m- <i>Irf3</i> -R    | CTTCCAGGTTGACACGTCCG     |
| m- <i>Irf8</i> -F    | CGGGGCTGATCTGGGAAAAT     |
| m- <i>Irf8</i> -R    | CACAGCGTAACCTCGTCTTC     |
| m- <i>Hprt</i> -F    | GATTAGCGATGATGAACCAGGTT  |
| m- <i>Hprt</i> -R    | CCTCCCATCTCCTTCATGACA    |
| m- <i>Reg3γ</i> -F   | CAGACAAGATGCTTCCCCGT     |
| m- <i>Reg3γ</i> -R   | GCAACTTCACCTTGACACCTG    |
| m- <i>Il18bp</i> -F  | GAGGGCCACACAAGTCGC       |
| m- <i>Il18bp</i> -R  | GCTGGGCCAGAATGATGTGA     |
| <i>Gfp</i> -F        | TACGGCGTGCAGTGCTTCAG     |
| <i>Gfp</i> -R        | TCAGCTCGATGCGGTTCCACC    |

**Supplementary information Table S1** List of sequences**1.2 Human gene qPCR primer list**

| <b>Name</b>          | <b>Sequence</b>       |
|----------------------|-----------------------|
| h- <i>SLC22A5</i> -F | CACCATTGTGACCGAGCAAGA |
| h- <i>SLC22A5</i> -R | TTCCAGTCGTCCTCACACACC |
| h- <i>CARINH</i> -F3 | GGGTGCCAGAGTTTGTAGCC  |
| h- <i>CARINH</i> -R3 | AATGCTGCAAGCAGGAGTCTA |
| h- <i>IL18BP</i> -F  | CAGCTCTGGGCTGGGCTGAG  |
| h- <i>IL18BP</i> -R  | GGGGTGTGTTGCGCATCCAC  |
| h- <i>IRF1</i> -F2   | CTGTGCGAGTGTACCGGATG  |
| h- <i>IRF1</i> -R2   | ATCCCCACATGACTTCCTCTT |

**Supplementary information Table S1** List of sequences**1.3 ChIP-qPCR primer list**

| <b>Name</b>                | <b>Sequence</b>         |
|----------------------------|-------------------------|
| <i>U1</i> -F               | ATACTTACCTGGCAGGGGAG    |
| <i>U1</i> -R               | CAGGGGAAAGCGCGAACGCA    |
| <i>Irf1</i> -H3K27ac-A-F   | ACATTCAAACCTGGGTGCTGT   |
| <i>Irf1</i> -H3K27ac-A-R   | CTCAGGCTTCTTCATTTCGCT   |
| <i>Irf1</i> -H3K27ac-B-F   | AGGAATAAGGGTTCGCCTTG    |
| <i>Irf1</i> -H3K27ac-B-R   | ACTTGCTAGTCTGAAGTGATG   |
| <i>Irf1</i> -H3K27ac-C-F   | CGTGGAGAAGGGGAAGACCA    |
| <i>Irf1</i> -H3K27ac-C-R   | CCTTGCTCCACTCCACTC      |
| <i>Irf1</i> -H3K27ac-D-F   | CGAAATGATGAGGCCGAGT     |
| <i>Irf1</i> -H3K27ac-D-R   | CTAAACACTTAGCGGGATTCC   |
| <i>Irf1</i> -H3K27ac-E-F   | ACGTGCTTTTCACAGTCTAAGCC |
| <i>Irf1</i> -H3K27ac-E-R   | CAGGAGCGATTTCGCAGAGG    |
| <i>Irf1</i> -H3K27ac-F-F   | GACTGAAAAGAATGGGCAGGTGG |
| <i>Irf1</i> -H3K27ac-F-R   | CCTCACACCCAGGTCATTACC   |
| <i>Slc22a5</i> -H3K27ac-F1 | GCACTGCCAGGGAGGAAGAACAC |
| <i>Slc22a5</i> -H3K27ac-R1 | AAGGCCATGGAACAGATGCTGCC |
| <i>Slc22a5</i> -H3K27ac-F2 | CTCCGCAGCCACAAAAGATGGC  |
| <i>Slc22a5</i> -H3K27ac-R2 | AGGGGGCGGAATTGGGTCTTTTC |
| <i>Irf3</i> -H3K27ac-F1    | GCTTGTGCTGAAGCTGAACCGT  |
| <i>Irf3</i> -H3K27ac-R1    | GAAGGGATCACTTGCCCAGAC   |
| <i>Irf3</i> -H3K27ac-F2    | AGGGCGCCTAACTCCAAGGA    |
| <i>Irf3</i> -H3K27ac-R2    | GAAATCGGACCAGCGTTTGCC   |
| <i>Irf7</i> -H3K27ac-F1    | TGGGTGCTGGATTTGAACCCCTG |
| <i>Irf7</i> -H3K27ac-R1    | CTGGCTGTCTGGAACCTCACTC  |
| <i>Irf7</i> -H3K27ac-F2    | GAACAGGAGGGAAGGATTTGCA  |
| <i>Irf7</i> -H3K27ac-R2    | GACAAGAATTTCCCCTGTGGCA  |
| <i>Irf8</i> -H3K27ac-F1    | TCTAGAACACTTCGGGGCCT    |
| <i>Irf8</i> -H3K27ac-R1    | TGTACATTTCCACACGCCA     |
| <i>Irf8</i> -H3K27ac-F2    | CGCCCCCGGAGTAAAGAGAGA   |
| <i>Irf8</i> -H3K27ac-R2    | ACCCCATCGCGTCCTACCTG    |

**Supplementary information Table S1** List of sequences**1.4 shRNA sequence list**

| <b>Name</b>        | <b>Sequence</b>                                             |
|--------------------|-------------------------------------------------------------|
| <i>mCarinh</i> -F1 | CCGGGCTATCCTCAGGGTGTATAGCGGATCCGCTATACACCCTGAGGATAGCtttttg  |
| <i>mCarinh</i> -R1 | aattcaaaaaGCTATCCTCAGGGTGTATAGCGGATCCGCTATACACCCTGAGGATAGC  |
| <i>mCarinh</i> -F2 | CCGGGCTCTAGGAAACAGCCTATGGGGATCCCCATAGGCTGTTTCCTAGAGCtttttg  |
| <i>mCarinh</i> -R2 | aattcaaaaaGCTCTAGGAAACAGCCTATGGGGATCCCCATAGGCTGTTTCCTAGAGC  |
| <i>mCarinh</i> -F3 | CCGGGGAGTGTCAGTTTCCTGTTGCGGATCCGCAACAGGAAACTGACACTCCtttttg  |
| <i>mCarinh</i> -R3 | aattcaaaaaGGAGTGTCAGTTTCCTGTTGCGGATCCGCAACAGGAAACTGACACTCC  |
| <i>hCARINH</i> -F1 | CCGGGCCAGTACCAGGAAAGGATAGGGATCCCTATCCTTTTCCTGGTACTGGCtttttg |
| <i>hCARINH</i> -R1 | aattcaaaaaGCCAGTACCAGGAAAGGATAGGGATCCCTATCCTTTTCCTGGTACTGGC |
| <i>hCARINH</i> -F2 | CCGGGCAGAGCTCCCAGATATATGCGGATCCGCATATATCTGGGAGCTCTGCtttttg  |
| <i>hCARINH</i> -R2 | aattcaaaaaGCAGAGCTCCCAGATATATGCGGATCCGCATATATCTGGGAGCTCTGC  |
| <i>hCARINH</i> -F3 | CCGGGGTATATCGTAGGTGGCTTTAGGATCCTAAAGCCACCTACGATATAACCtttttg |
| <i>hCARINH</i> -R3 | aattcaaaaaGGTATATCGTAGGTGGCTTTAGGATCCTAAAGCCACCTACGATATAACC |

**Supplementary information Table S1** List of sequences**1.5 siRNA sequence list**

| <b>Name</b>              | <b>Sense</b>            | <b>Anti-sense</b>     |
|--------------------------|-------------------------|-----------------------|
| <i>IRF1</i> -homo-617    | GCCGAGAUGC UAAGAGCAATT  | UUGCUCUUAGCAUCUCGGCTT |
| <i>IRF1</i> -homo-722    | GCUACACAGU UCCAGGCUATT  | UAGCCUGGAACUGUGUAGCTT |
| <i>IRF1</i> -homo-1031   | CCUCUGUCUA UGGGAGACUUTT | AAGUCUCCAUAGACAGAGGTT |
| <i>Gm12216</i> -mus-309  | CCAACAUCGC UUCCACUUUTT  | AAAGUGGAAGCGAUGUUGGTT |
| <i>Gm12216</i> -mus-662  | GCCUAUCCCAG GCUUUGAUTT  | AUCAAGCCUGGGAUAGGCTT  |
| <i>Gm12216</i> -mus-996  | GCUAUCCUCAG GGUGUAUATT  | GCUAUCCUCAGGGUGUAUATT |
| <i>C5orf56</i> -homo-507 | GCCAGUACCAG GAAAGGAUTT  | AUCCUUUCCUGGUACUGGCTT |
| <i>C5orf56</i> -homo-598 | GCUCCAGAUUA UUGCACATT   | UGUGCAUUAUCUGGGAGCTT  |
| <i>C5orf56</i> -homo-355 | GCUGGAGAGU UGAAUGCCATT  | UGGCAUUAACUCUCCAGCTT  |
